# Supplementary material for: Correction of the Marfan Syndrome Pathogenic FBN1 Mutation by Base Editing in Human Cells and Heterozygous Embryos
Source: PubMed Central journal article supplement — Mol Ther. 2018 Aug 14;26(11):2631–7. doi: 10.1016/j.ymthe.2018.08.007 (PMC6224777; doi:10.1016/j.ymthe.2018.08.007), 2018-08-14
Supplement: mmc1.pdf [file mmc1.pdf]

YMTHE, Volume 26

## **Supplemental Information**

### **Correction of the Marfan Syndrome**

### **Pathogenic *FBN1* Mutation by Base Editing**

### **in Human Cells and Heterozygous Embryos**

**Yanting Zeng, Jianan Li, Guanglei Li, Shisheng Huang, Wenxia Yu, Yu Zhang, Dunjin Chen, Jia Chen, Jianqiao Liu, and Xingxu Huang**

## SUPPLEMENTARY INFORMATION

**A**

CCGCCAATGGTGTTAACACATAGGAACTGGC (Sequence from NCBI)  
CCGCCAATGGTGTTAACACATAGGAACTGGC (WT, 11/20)  
CCGCCAATGGTGTTAACACgTAGGAACTGGC (MT, 9/20)

**B**

CCGCCAATGGTGTTAACACATAGGAACTGGC (Sequence from NCBI)  
CCGCCAATGGTGTTAACACATAGGAACTGGC (WT, 13/26)  
CCGCCAATGGTGTTAACACgTAGGAACTGGC (MT, 13/26)

**Figure S1 The genotype analysis of the patient.**

The TA clones of the PCR products of genomic DNA from blood (A) and sperm (B) of one patient with Marfan Syndrome were analyzed by DNA sequencing. The PAM sequences are underlined; the targeted bases (wild type in upper, while mutant in lower case) are highlighted in red; the N/N represents wild type (WT) or mutant (MT) colonies out of total sequenced.

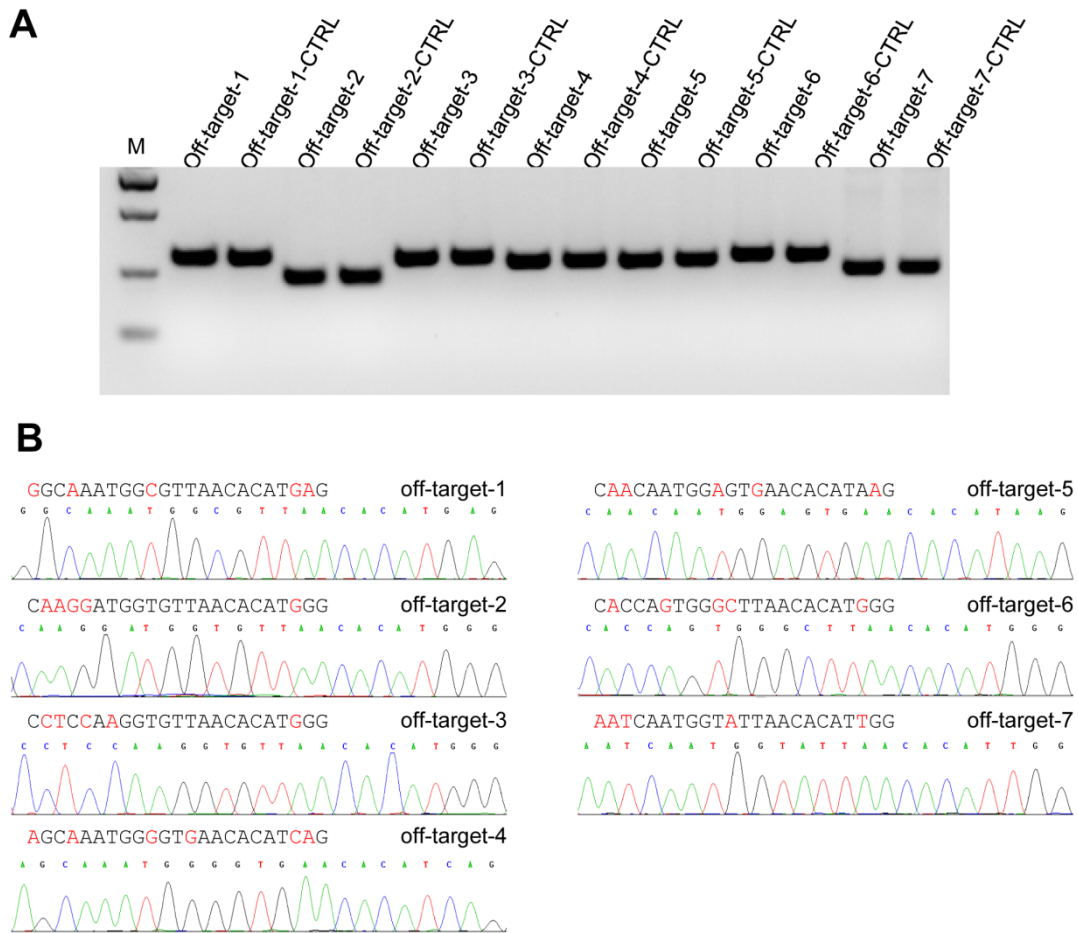

**Figure S2 Off-target detection in HEK293T cells.**

A. Off-target analysis by T7EN1 cleavage assay. Genomic DNA from base-edited cells was amplified by PCR using primers for 7 potential off-target sites of the sgRNA for the mutagenesis listed in Table S1. The PCR products were subjected to T7EN1 cleavage assay.

B. The representative chromatogram of sequencing of the amplified PCR from A. The red characters were the mismatch sites compared with the mutational sgRNA.

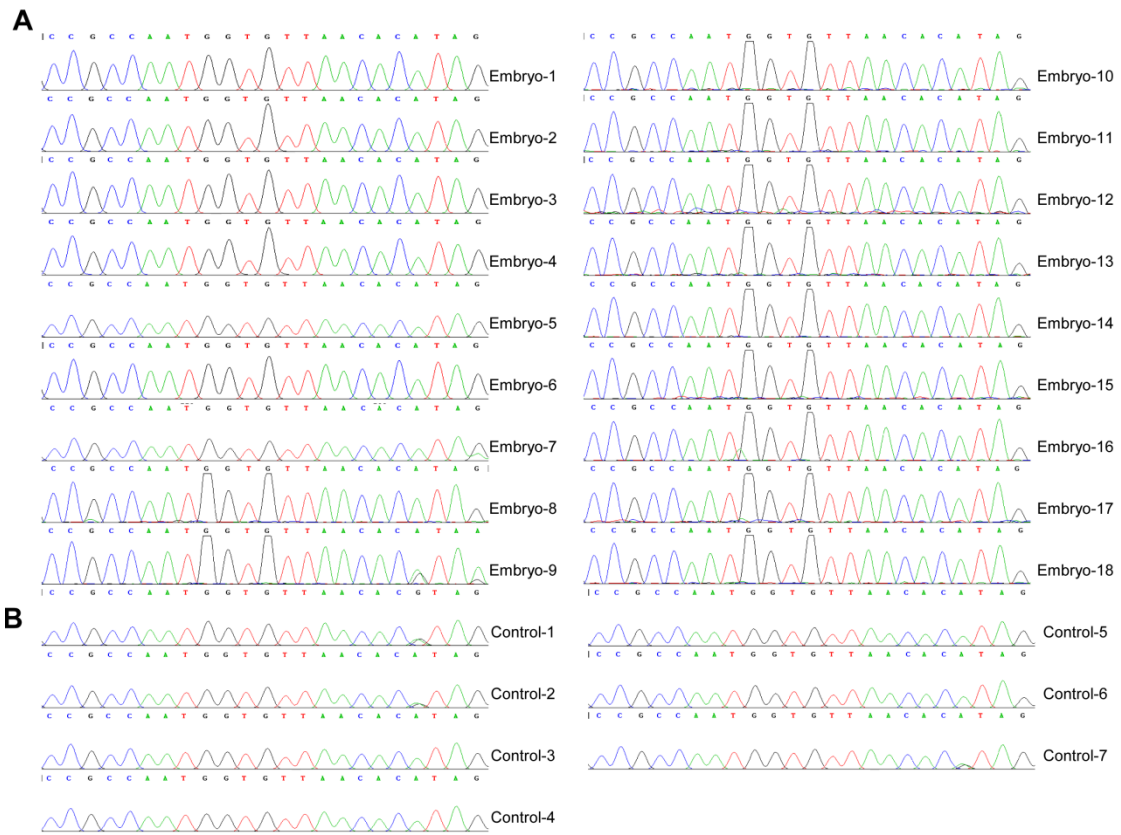

**Figure S3 The genotype of the corrected embryos by BE3 and the control human heterozygous embryos.**

The representative chromatogram of the sequencing of PCR products was from all the test (A) and control (B) human embryos. All the heterozygous human embryos were collected, and the genomic DNA was extracted and amplified by PCR. The PCR products were analyzed by DNA sequencing. The target bases were highlighted by red (test) or black (control) boxes.

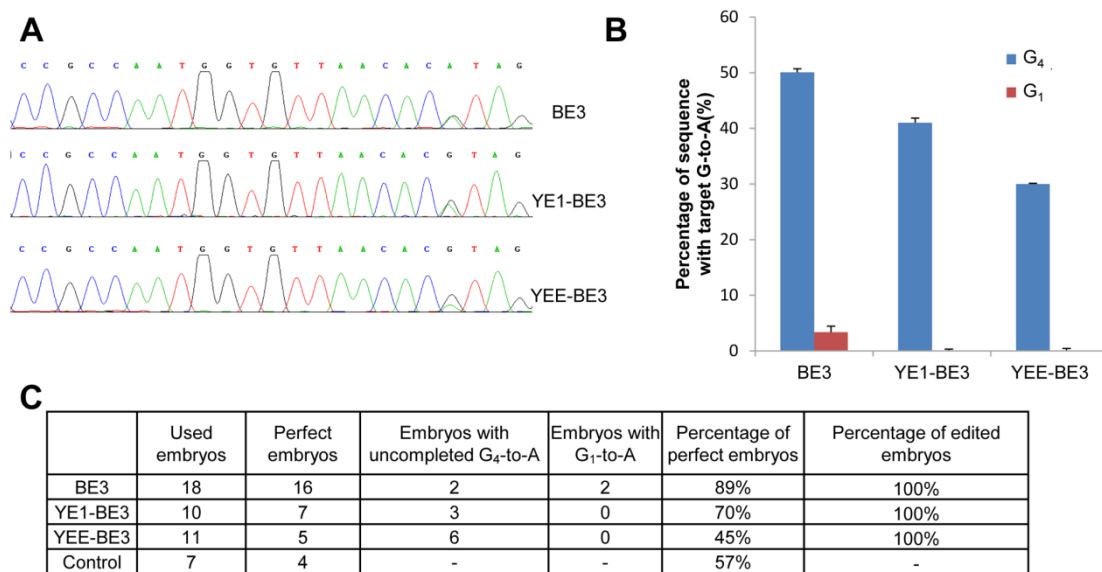

**Figure S4 BE3 shows the highest correction efficiency for the pathogenic site than YE1-BE3 and YEE-BE3.**

A. The FBN1T7498C cells were corrected using three kinds of BE3. The edited cells were used as the template for PCR and Sanger sequence.

B. The deep sequencing was used to detect the editing efficiency, and the percentage of G-to-A at G<sub>4</sub> and G<sub>1</sub> for correctional sgRNA was analyzed. Data are shown as means  $\pm$  s.d. from three independent experiments.

C. The summary of the used embryos for correcting the pathogenic sites using three base editors.

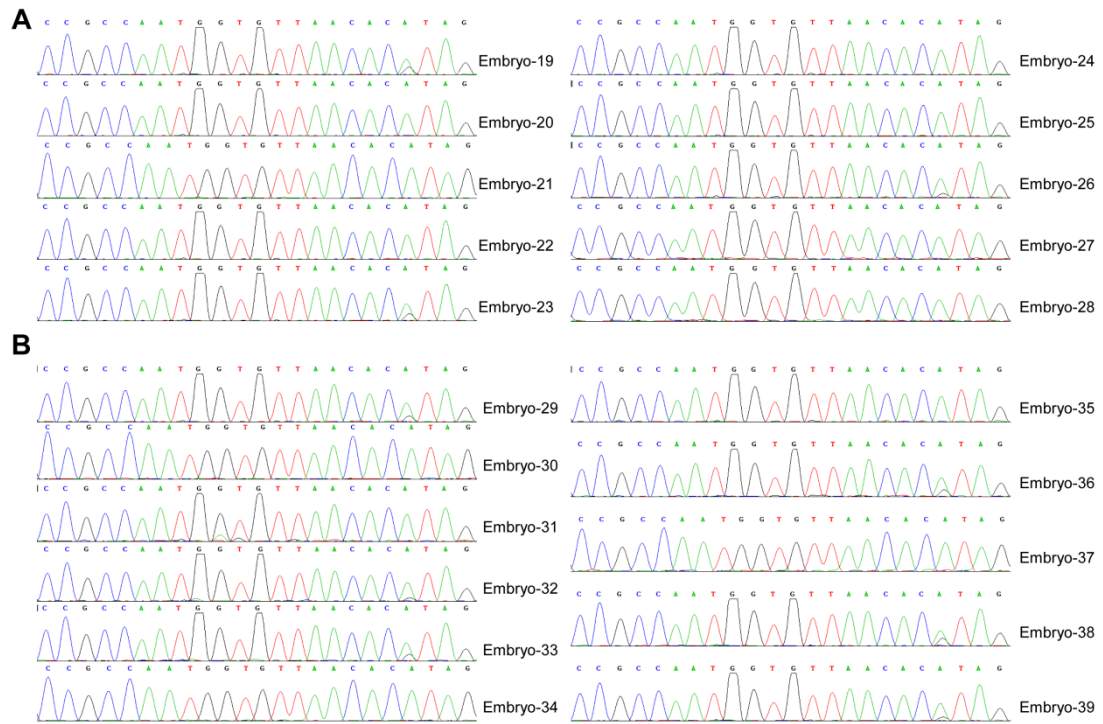

**Figure S5 The genotype of the corrected embryos by YE1-BE3 and YEE-BE3**

The representative chromatogram of the sequencing of PCR products was from all the YE1-BE3 corrected (A) and YEE-BE3 corrected (B) embryos. All the edited human embryos were collected, and the genomic DNA was extracted and amplified by PCR. The PCR products were analyzed by DNA sequencing.

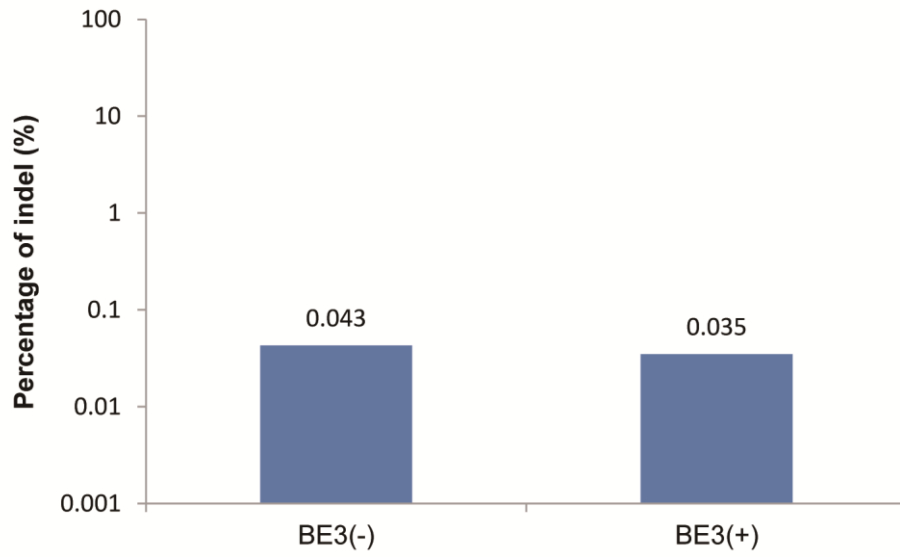

**Figure S6 Indel analysis of the corrected and control human heterozygous embryos.** Genomic DNA from 7 corrected and 3 control human embryos were collected, the genomic DNA was extracted and amplified by PCR. The PCR products were analyzed by deep sequencing.

**Table S1 The primers used in the research**

| Primer name              | Sequence (5' - 3')      | Product length (bp) | Usage                                                           |
|--------------------------|-------------------------|---------------------|-----------------------------------------------------------------|
| FBN1-ON-200-F            | ACTCACCAATGCAGGACGTA    | 200                 | Amplification for the on-target sites                           |
| FBN1-ON-200-R            | AGCTGCTTCATAGGGTCAGC    |                     |                                                                 |
| FBN1-ON-676-F            | GCTGAAGTCTCCACCCACC     | 676                 |                                                                 |
| FBN1-ON-676-R            | TGTCTCTCCTTGCCTTTTG     |                     |                                                                 |
| FBN1-mutation-off1-301-F | TCAAGGGACAGGAGTAGGCA    | 301                 | Amplification for the off-target sites of the mutation sgRNA    |
| FBN1-mutation-off1-301-R | TTGGGGCAGGAGGTTTTGTT    |                     |                                                                 |
| FBN1-mutation-off2-223-F | ATCTTAATCAGGGCCTTGA     | 223                 |                                                                 |
| FBN1-mutation-off2-223-R | GCCTTCATTCCATCAACTG     |                     |                                                                 |
| FBN1-mutation-off3-296-F | CAGGTTTCGTGTCGCAGTAGC   | 296                 |                                                                 |
| FBN1-mutation-off3-296-R | CTGTGTTGCCAGCACGAAA     |                     |                                                                 |
| FBN1-mutation-off4-282-F | TGGTAGTGGTTGGTGACACT    | 282                 |                                                                 |
| FBN1-mutation-off4-282-R | CGTTACATTGGAAGCGGAA     |                     |                                                                 |
| FBN1-mutation-off5-272-F | GGATTCAACATAGATTGGAA    | 272                 |                                                                 |
| FBN1-mutation-off5-272-R | CCCGTTTACACATTGCTA      |                     |                                                                 |
| FBN1-mutation-off6-302-F | TTCTAGTAGGTGAAAAGGG     | 302                 |                                                                 |
| FBN1-mutation-off6-302-R | TTGGACACCACATAGACAG     |                     |                                                                 |
| FBN1-mutation-off7-252-F | TATTATTGCTAAACCGAAACCA  | 252                 |                                                                 |
| FBN1-mutation-off7-252-R | AGCCCCTCACCCACTCAT      |                     |                                                                 |
| FBN1-BE-OFF1-370-F       | AGAGGCTTGCGAAGGACATC    | 370                 | Amplification for the off-target sites of the base editor sgRNA |
| FBN1-BE-OFF1-370-R       | ATTTGGTCTAGGGCAGAGGC    |                     |                                                                 |
| FBN1-BE-OFF2-247-F       | ATTATTCACAAGTTATGGTA    | 247                 |                                                                 |
| FBN1-BE-OFF2-247-R       | TAACCCTCTTCTTTGTAA      |                     |                                                                 |
| FBN1-BE-OFF3-235-F       | AAGGGACTGTTTTTGTCTGTCA  | 235                 |                                                                 |
| FBN1-BE-OFF3-235-R       | GTGAAACCACCATGACATGAAGT |                     |                                                                 |
| FBN1-BE-OFF4-262-F       | GTCATACTTGCCAGGGTCC     | 262                 |                                                                 |
| FBN1-BE-OFF4-262-R       | CCCACGTGAGCTGGCTAAAA    |                     |                                                                 |
| FBN1-BE-OFF5-448-F       | TGATCAGCATGTGGAGCCTG    | 448                 |                                                                 |
| FBN1-BE-OFF5-448-R       | GAAGTCAGCCAGGAGCCATT    |                     |                                                                 |
| FBN1-BE-OFF6-296-F       | GAGTTAGGAGTGGGAAGG      | 296                 |                                                                 |
| FBN1-BE-OFF6-296-R       | ACAAAGGACAGTAATGAAGAG   |                     |                                                                 |
| FBN1-BE-OFF7-208-F       | TTTGCTCCTTGATTCCCCC     | 208                 |                                                                 |
| FBN1-BE-OFF7-208-R       | GTGGATGGTGTGGAGGTGAG    |                     |                                                                 |
| FBN1-BE-OFF8-208-F       | CGCAGAACCAGACATCTT TAG  | 208                 |                                                                 |
| FBN1-BE-OFF8-208-R       | TTTGTTAGTAGCACAGGGGC    |                     |                                                                 |
| FBN1-BE-OFF9-223-F       | AAATTTGGAGAATATAGCTAGG  | 223                 |                                                                 |
| FBN1-BE-OFF9-223-R       | GAAAGTGCTTGAAACATAGTAA  |                     |                                                                 |
| FBN1-BE-OFF10-229-F      | ACAGGCATAAGTCACCGCA     | 229                 |                                                                 |
| FBN1-BE-OFF10-229-R      | CACTGGGTACCTGGCATT      |                     |                                                                 |



|                     |                         |     |                                                                             |
|---------------------|-------------------------|-----|-----------------------------------------------------------------------------|
| FBN1-BE-OFF11-238-F | CCTTTACAGGCTCACATCTT    | 238 | Amplification<br>for the<br>off-target sites<br>of the base<br>editor sgRNA |
| FBN1-BE-OFF11-238-R | GTAGTTTTGAGATAAGATAACCG |     |                                                                             |
| FBN1-BE-OFF12-232-F | TAGCATTGTGGCAGTTAC      | 232 |                                                                             |
| FBN1-BE-OFF12-232-R | GCGATTGTTTTCTTGTTTCT    |     |                                                                             |
| FBN1-BE-OFF13-206-F | AATCAGCTTTGACAAATATTGTA | 206 |                                                                             |
| FBN1-BE-OFF13-206-R | AGTAACTGGAATCCGTGCTA    |     |                                                                             |
| FBN1-BE-OFF14-222-F | CCTGGTCATAATGTGGGTC     | 222 |                                                                             |
| FBN1-BE-OFF14-222-R | CTGCCTGGCTGAGGAATA      |     |                                                                             |
| FBN1-BE-OFF15-223-F | CATTTATCTGGTTTTCTTGTT   | 223 |                                                                             |
| FBN1-BE-OFF15-223-R | ACAAGTGAATCACCATAGTCC   |     |                                                                             |
| FBN1-BE-OFF16-239-F | GGCAAGAGAAGGAGAGAGG     | 239 |                                                                             |
| FBN1-BE-OFF16-239-R | TTTGGGAAGTTTGAGAAAAA    |     |                                                                             |
| FBN1-BE-OFF17-248-F | CAGCAGGTGTGGTCGTTTT     | 248 |                                                                             |
| FBN1-BE-OFF17-248-R | TTCACCTCATCAACACCCC     |     |                                                                             |
| FBN1-BE-OFF18-249-F | TAAAATGTATGTAGGGAAAGC   | 249 |                                                                             |
| FBN1-BE-OFF18-249-R | ATAAGTCAAAGGAAAAGTGAAA  |     |                                                                             |
| FBN1-BE-OFF19-233-F | AAAAAGAGAAAGAGGGAGTCA   | 233 |                                                                             |
| FBN1-BE-OFF19-233-R | CAAGGGATAGGAGACATCG     |     |                                                                             |
| FBN1-BE-OFF20-285-F | GAGAAGCAAATGGTTTATGGT   | 285 |                                                                             |
| FBN1-BE-OFF20-285-R | TTAGATTAGCAGATACTCAGGGA |     |                                                                             |
| FBN1-BE-OFF21-288-F | GATGTAAATGTGAAAATGGAAAC | 288 |                                                                             |
| FBN1-BE-OFF21-288-R | CTCTGTTGGGTTATCGTGC     |     |                                                                             |
| FBN1-BE-OFF22-243-F | GGCTGGTTATTTTTCTTCAA    | 243 |                                                                             |
| FBN1-BE-OFF22-243-R | GAGTCAAAGTAGTGCCTGGA    |     |                                                                             |
| FBN1-BE-OFF23-206-F | GAAAAGAGGCTCTAATTGTAGG  | 206 |                                                                             |
| FBN1-BE-OFF23-206-R | GTCTGAGGCAGCACTTTGT     |     |                                                                             |
| FBN1-BE-OFF24-229-F | TCAATAAGAAAAAGTCTCAACAG | 229 |                                                                             |
| FBN1-BE-OFF24-229-R | CGCTTTTCTGATATGCTA      |     |                                                                             |
| FBN1-BE-OFF25-217-F | AAATCTTGACTTTTTCATACTC  | 217 |                                                                             |
| FBN1-BE-OFF25-217-R | ATGAACCCAGATGAGCCA      |     |                                                                             |
| FBN1-BE-OFF26-249-F | TAATGGGATGGCTGGGTC      | 249 |                                                                             |
| FBN1-BE-OFF26-249-R | AAATGCTTATCATCACTGGTCA  |     |                                                                             |
| FBN1-BE-OFF27-248-F | GCTTCAAGTAATAACAGTCCGTA | 248 |                                                                             |
| FBN1-BE-OFF27-248-R | CCAAAGTGCTGGGATTACA     |     |                                                                             |
| FBN1-BE-OFF28-267-F | ATCTTTTTATGTATCCACGG    | 267 |                                                                             |
| FBN1-BE-OFF28-267-R | ACTGACCTTTGGTGAGTAATAA  |     |                                                                             |
| FBN1-BE-OFF29-206-F | CAAAACCTCTAGTTCCTGA     | 206 |                                                                             |
| FBN1-BE-OFF29-206-R | ACAGAACAGATGCCTCAAAA    |     |                                                                             |
| FBN1-BE-OFF30-228-F | TACCATCTCACGCCAGTTAG    | 228 |                                                                             |
| FBN1-BE-OFF30-228-R | GCATGATTACAATCCTTTGG    |     |                                                                             |
| FBN1-BE-OFF31-242-F | CAAGGAGAGTGCTGTAAAGAG   | 242 |                                                                             |
| FBN1-BE-OFF31-242-R | GCATAGGAATGTAGAGGAGTTTA |     |                                                                             |
|                     |                         |     |                                                                             |

|                     |                        |     |  |
|---------------------|------------------------|-----|--|
| FBN1-BE-OFF32-370-F | CGATAAAGGGATCAGTCACTAA | 370 |  |
| FBN1-BE-OFF32-370-R | GCTCCAGGTCCACAAACAC    |     |  |
